# Supplementary material
Source: PubMed Central journal article supplement (PMC3864587)
Supplement: NIHMS508159-supplement-1.pdf [file NIHMS508159-supplement-1.pdf]

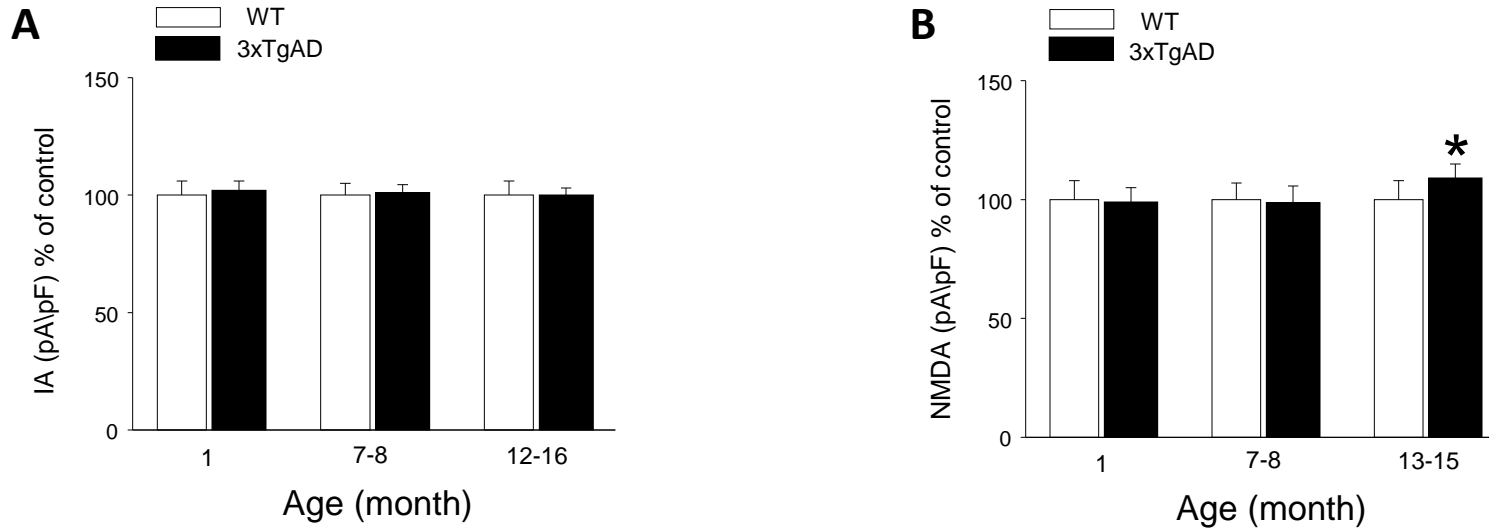

Supplemental Figure 1. Potassium channel and NMDA receptor channel current densities in CA1 neurons of wild type and 3xTgAD mice of different ages. Potassium channel current density (A) and NMDA channel current density expressed as a percentage of the control level in wild type (WT) and 3xTgAD mice of the indicated ages. \*p<0.05 compared to the value for age-matched WT mice.
